# Supplementary material for: Colchicine ameliorates myocardial injury induced by coronary microembolization through suppressing pyroptosis via the AMPK/SIRT1/NLRP3 signaling pathway
Source: PubMed Central journal article supplement (PMC10765930; doi:10.1186/s12872-023-03697-8), 2024-01-03
Supplement: 12872_2023_3697_MOESM1_ESM.pdf [file 12872_2023_3697_MOESM1_ESM.pdf]

The original images of the representative western blot bands in

**Fig.3B**

NLRP3

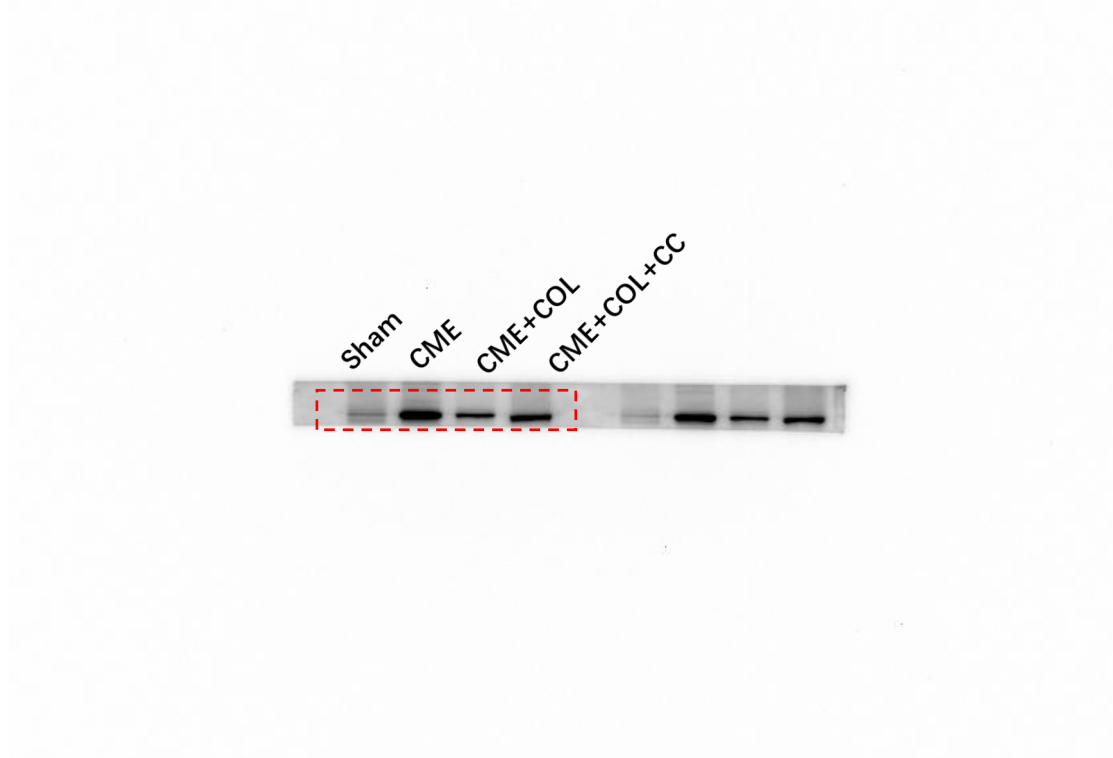

GSDMD-N

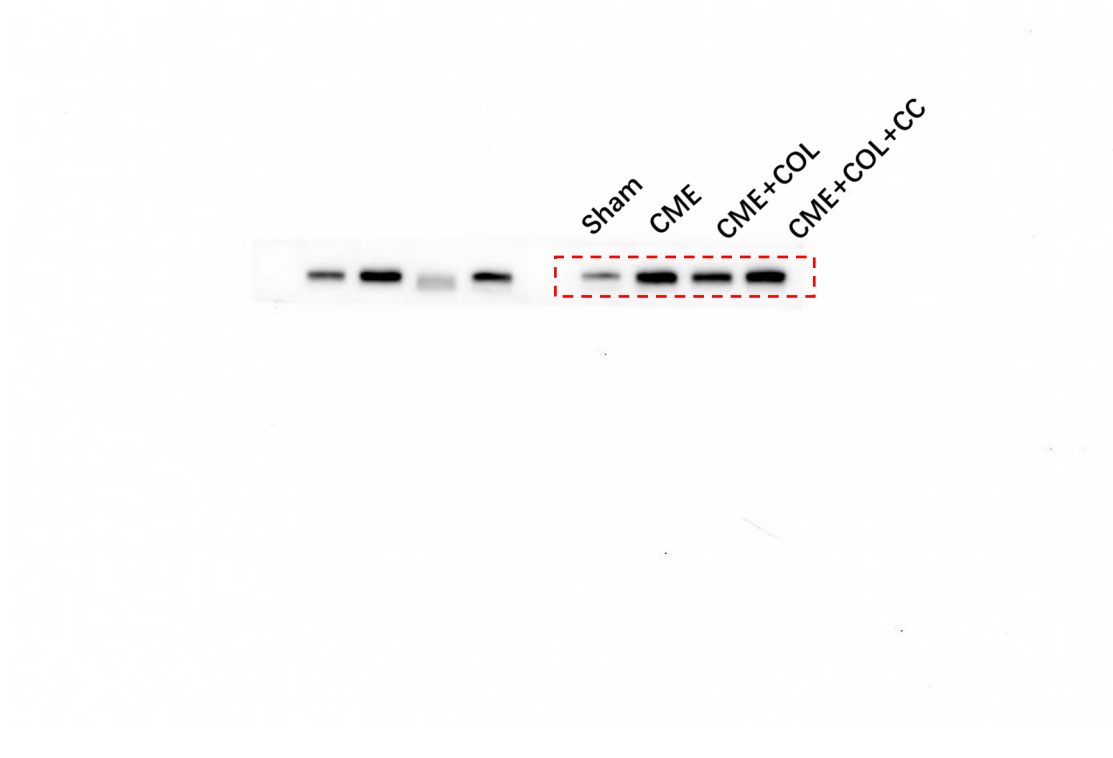

ASC

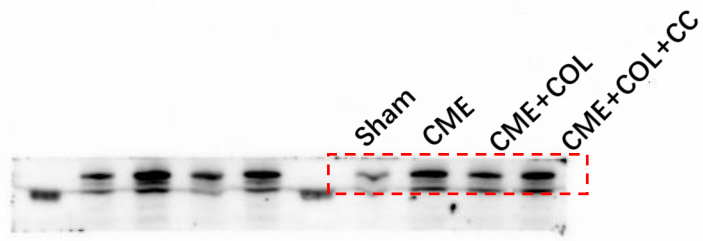

IL-18

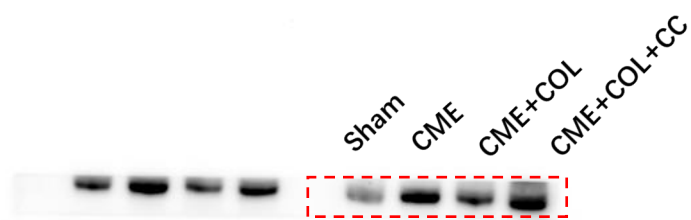

Caspase-1 p20

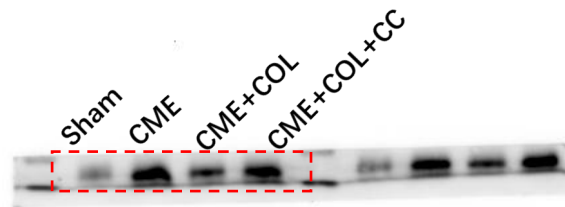

IL-1 $\beta$

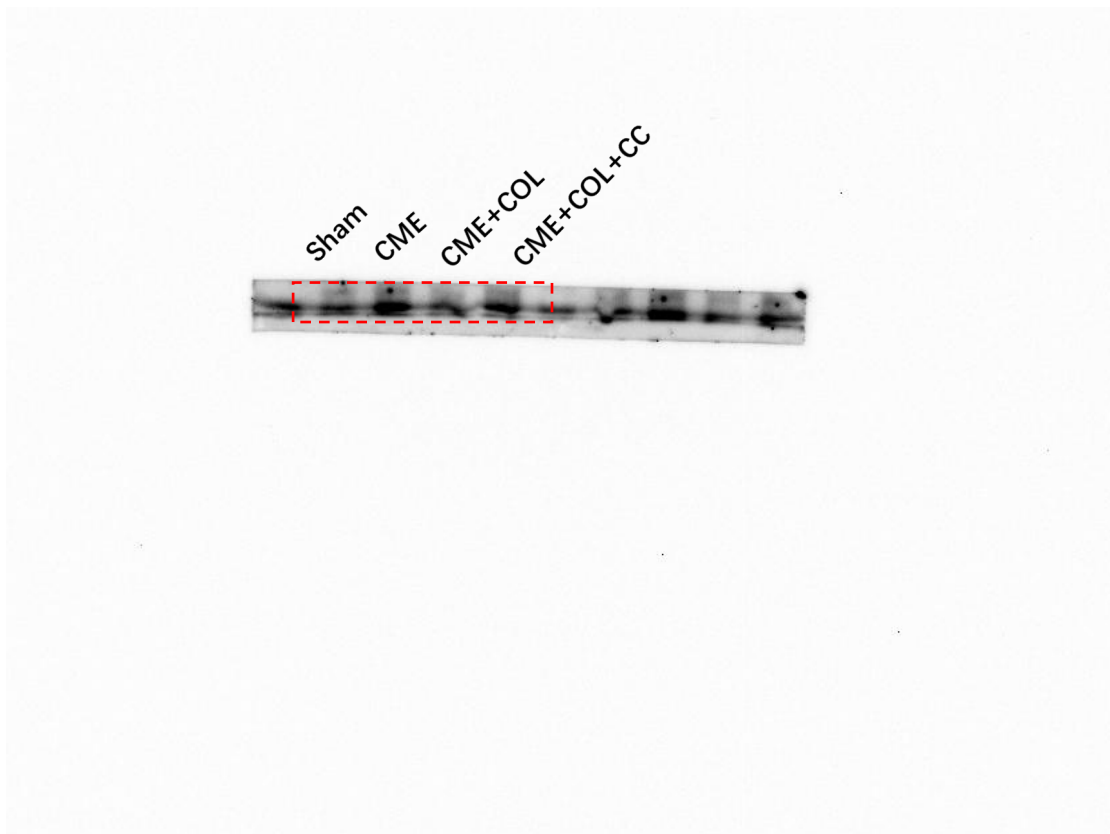

**GAPDH**

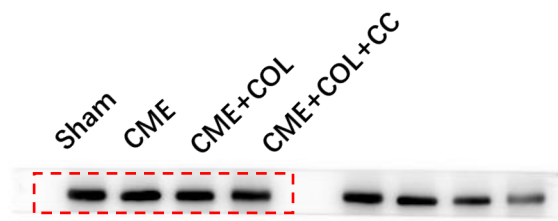

The original images of the representative western blot bands in

**Fig.5A**

P-AMPK

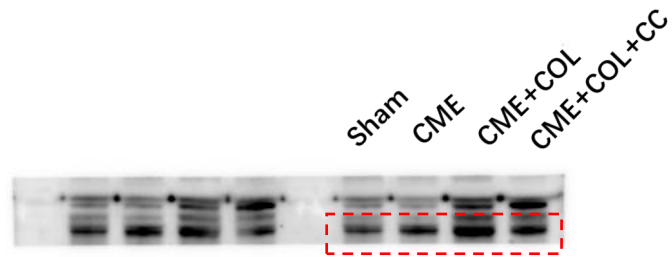

AMPK

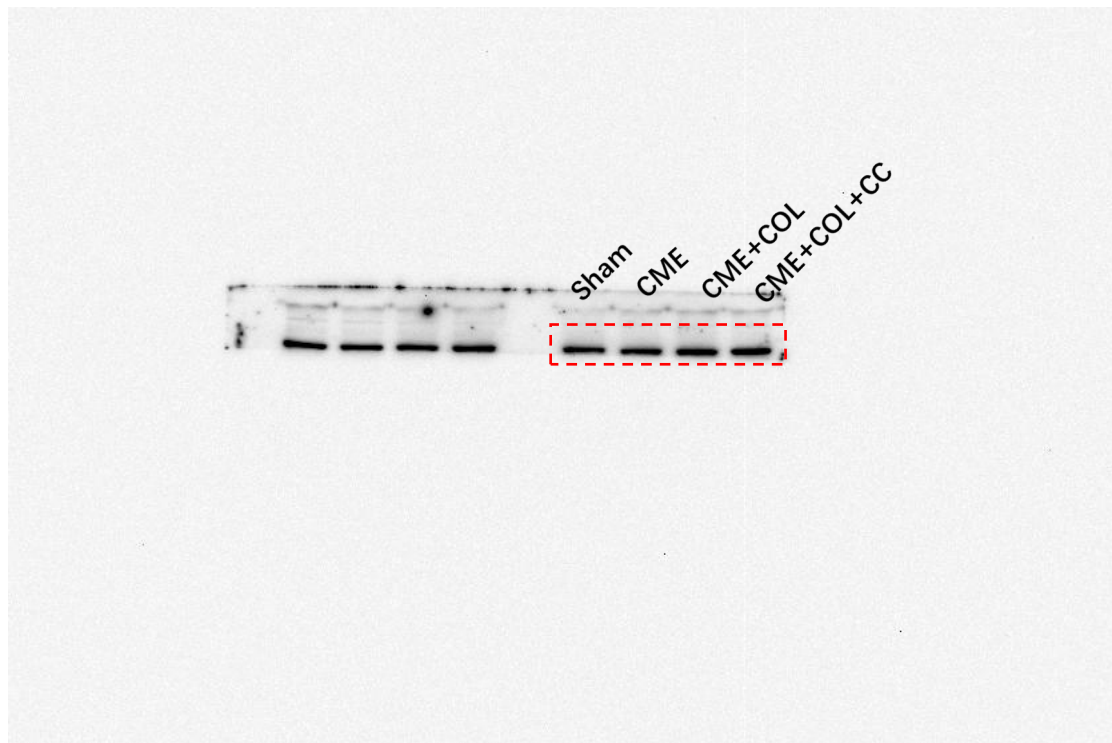

**SIRT1**

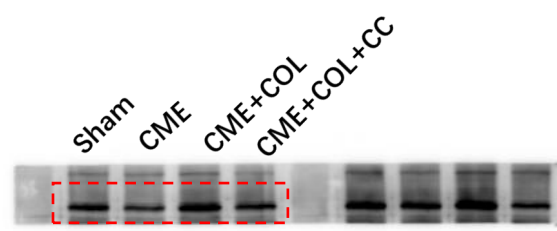

**GAPDH**

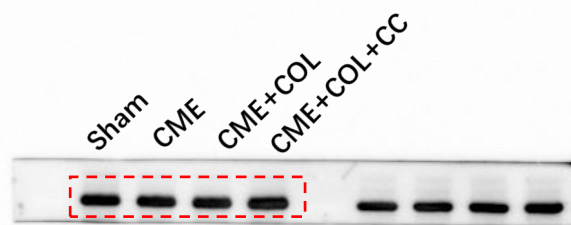

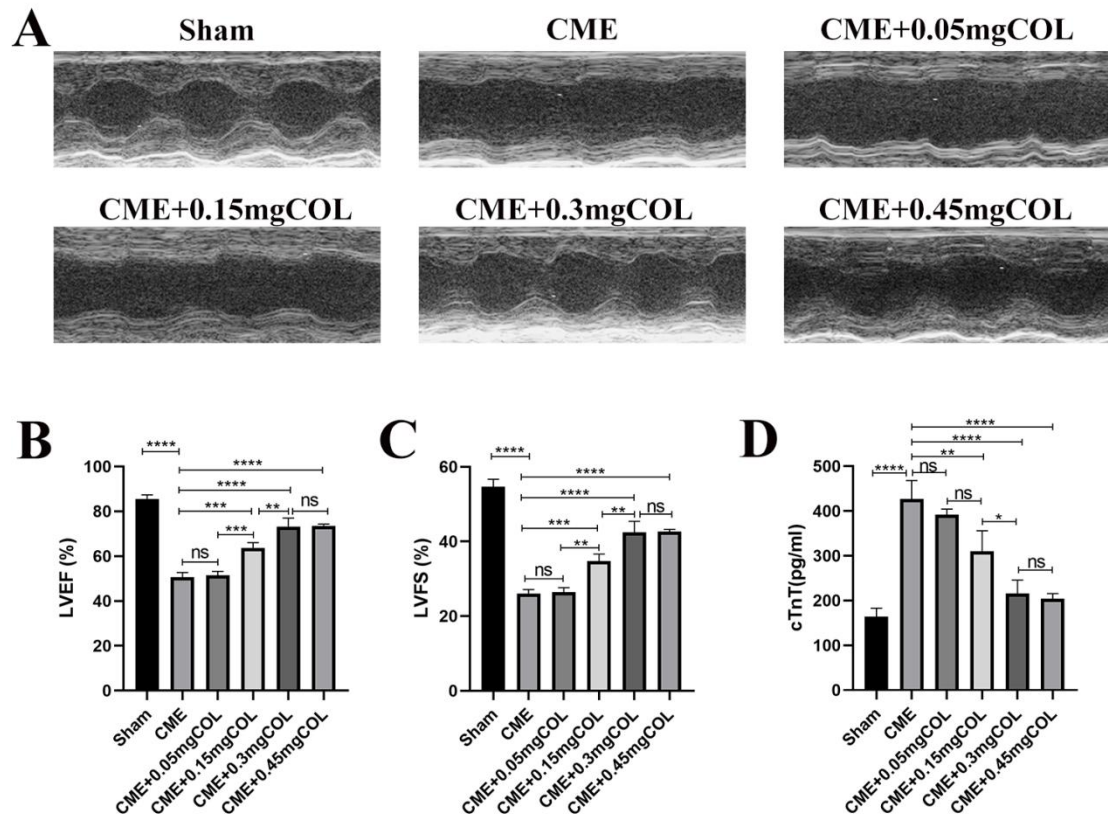

**Figure S1.** Effects of different doses of colchicine on cardiac function and myocardial injury induced by coronary microembolization in rats. (A) The representative echocardiography in each group. (B-C) The measurement results of left ventricular ejection fraction (LVEF) and left ventricular fractional shortening (LVFS) (n=3 per group). (D) The levels of serum cTnT in each group (n=3). \*p < 0.05, \*\*p < 0.01, \*\*\*p < 0.001, \*\*\*\*p < 0.0001, ns=no significance.
